# Supplementary material
Source: HighWire-hosted journal article supplement (https://svn.smart01.highwire.org/content/svn-2024-003164)
Supplement: inline-supplementary-material-1 [file inline-supplementary-material-1.pdf]

| Supplementary Table1. List of ICD-9 and ICD-10 Diagnosis Codes Used |                                                                                                                                                                                                                                                                                                                                                                                                                          |                                                                                                                                                                                                                                                                                                                                                                                                                                                                                                                                                                                                                                                                                                                                                                                                                                                                                                                                                                                                                                                                                                                                                                                                                                                           |
|---------------------------------------------------------------------|--------------------------------------------------------------------------------------------------------------------------------------------------------------------------------------------------------------------------------------------------------------------------------------------------------------------------------------------------------------------------------------------------------------------------|-----------------------------------------------------------------------------------------------------------------------------------------------------------------------------------------------------------------------------------------------------------------------------------------------------------------------------------------------------------------------------------------------------------------------------------------------------------------------------------------------------------------------------------------------------------------------------------------------------------------------------------------------------------------------------------------------------------------------------------------------------------------------------------------------------------------------------------------------------------------------------------------------------------------------------------------------------------------------------------------------------------------------------------------------------------------------------------------------------------------------------------------------------------------------------------------------------------------------------------------------------------|
| Diagnosis                                                           | ICD-9                                                                                                                                                                                                                                                                                                                                                                                                                    | ICD-10                                                                                                                                                                                                                                                                                                                                                                                                                                                                                                                                                                                                                                                                                                                                                                                                                                                                                                                                                                                                                                                                                                                                                                                                                                                    |
| Alzheimer's Disease                                                 | ICD-9-D-3310                                                                                                                                                                                                                                                                                                                                                                                                             | ICD-10-D-G300, ICD-10-D-G301, ICD-10-D-G308, ICD-10-D-G309                                                                                                                                                                                                                                                                                                                                                                                                                                                                                                                                                                                                                                                                                                                                                                                                                                                                                                                                                                                                                                                                                                                                                                                                |
| Asymptomatic Extracranial Carotid Atherosclerotic Disease           | ICD-9-D-43310                                                                                                                                                                                                                                                                                                                                                                                                            | ICD-10-D-I6521, ICD-10-D-I6522, ICD-10-D-I6523, ICD-10-D-I6529                                                                                                                                                                                                                                                                                                                                                                                                                                                                                                                                                                                                                                                                                                                                                                                                                                                                                                                                                                                                                                                                                                                                                                                            |
| Carotid Endarterectomy (CEA)                                        | ICD-9-P-3812                                                                                                                                                                                                                                                                                                                                                                                                             | ICD-10-P-03CH0ZZ, ICD-10-P-03CJ0ZZ, ICD-10-P-03CK0ZZ, ICD-10-P-03CL0ZZ, ICD-10-P-03CL0Z6                                                                                                                                                                                                                                                                                                                                                                                                                                                                                                                                                                                                                                                                                                                                                                                                                                                                                                                                                                                                                                                                                                                                                                  |
| Carotid artery stenting (CAS)                                       | ICD-9-P-0063                                                                                                                                                                                                                                                                                                                                                                                                             |                                                                                                                                                                                                                                                                                                                                                                                                                                                                                                                                                                                                                                                                                                                                                                                                                                                                                                                                                                                                                                                                                                                                                                                                                                                           |
| Asthma                                                              | ICD-9-D-49300, ICD-9-D-49399                                                                                                                                                                                                                                                                                                                                                                                             | ICD-10-D-J452;ICD-10-D-J45988                                                                                                                                                                                                                                                                                                                                                                                                                                                                                                                                                                                                                                                                                                                                                                                                                                                                                                                                                                                                                                                                                                                                                                                                                             |
| Chronic Obstructive Pulmonary Disease (COPD)                        | ICD-9-D-490;ICD-9-D-49699                                                                                                                                                                                                                                                                                                                                                                                                | ICD-10-D-J44;ICD-10-D-J449                                                                                                                                                                                                                                                                                                                                                                                                                                                                                                                                                                                                                                                                                                                                                                                                                                                                                                                                                                                                                                                                                                                                                                                                                                |
| Chronic Kidney Disease                                              | ICD-9-D-585, ICD-9-D-5851, ICD-9-D-5852, ICD-9-D-5853, ICD-9-D-5854, ICD-9-D-5855, ICD-9-D-5856, ICD-9-D-5859, ICD-9-D-7925                                                                                                                                                                                                                                                                                              | ICD-10-D-N18;ICD-10-D-N189                                                                                                                                                                                                                                                                                                                                                                                                                                                                                                                                                                                                                                                                                                                                                                                                                                                                                                                                                                                                                                                                                                                                                                                                                                |
| Congestive Heart Failure                                            | ICD-9-D-39891, ICD-9-D-4280, ICD-9-D-4281, ICD-9-D-42820, ICD-9-D-42821, ICD-9-D-42822, ICD-9-D-42823, ICD-9-D-42830, ICD-9-D-42831, ICD-9-D-42832, ICD-9-D-42833, ICD-9-D-42840, ICD-9-D-42841, ICD-9-D-42842, ICD-9-D-42843, ICD-9-D-4289                                                                                                                                                                              | ICD-10-D-I150;ICD-10-D-I159                                                                                                                                                                                                                                                                                                                                                                                                                                                                                                                                                                                                                                                                                                                                                                                                                                                                                                                                                                                                                                                                                                                                                                                                                               |
| Coronary Artery Disease                                             | ICD-9-D-4110;ICD-9-D-4149                                                                                                                                                                                                                                                                                                                                                                                                | ICD-10-D-I25;ICD-10-D-I259                                                                                                                                                                                                                                                                                                                                                                                                                                                                                                                                                                                                                                                                                                                                                                                                                                                                                                                                                                                                                                                                                                                                                                                                                                |
| Diabetes                                                            | ICD-9-D-24900;ICD-9-D-25099, ICD-9-D-7902                                                                                                                                                                                                                                                                                                                                                                                | ICD-10-D-E080;ICD-10-D-E139                                                                                                                                                                                                                                                                                                                                                                                                                                                                                                                                                                                                                                                                                                                                                                                                                                                                                                                                                                                                                                                                                                                                                                                                                               |
| Hypertension                                                        | ICD-9-D-4010;ICD-9-D-4059                                                                                                                                                                                                                                                                                                                                                                                                | ICD-10-D-I10;ICD-10-D-I159                                                                                                                                                                                                                                                                                                                                                                                                                                                                                                                                                                                                                                                                                                                                                                                                                                                                                                                                                                                                                                                                                                                                                                                                                                |
| Neurosurgery or Brain Cancer                                        | ICD-9-D-01320, ICD-9-D-01321, ICD-9-D-01322, ICD-9-D-01323, ICD-9-D-01325, ICD-9-D-01326, ICD-9-D-01330, ICD-9-D-01333, ICD-9-D-1917, ICD-9-D-1918, ICD-9-D-1919, ICD-9-D-1983, ICD-9-D-2250, ICD-9-D-2375, ICD-9-D-2396, ICD-9-D-3481, ICD-9-D-3484, ICD-9-D-34882, ICD-9-D-7422, ICD-9-D-V1085, ICD-9-D-V1241                                                                                                          | ICD-10-D-A066, ICD-10-D-A1781, ICD-10-D-A5482, ICD-10-D-B431, ICD-10-D-C717, ICD-10-D-C718, ICD-10-D-C719, ICD-10-D-C7931, ICD-10-D-D330, ICD-10-D-D331, ICD-10-D-D332, ICD-10-D-D430, ICD-10-D-D431, ICD-10-D-D432, ICD-10-D-D496, ICD-10-D-G931, ICD-10-D-G935, ICD-10-D-G9382, ICD-10-D-S06317A, ICD-10-D-S06317S, ICD-10-D-S06327A, ICD-10-D-S06337A, ICD-10-D-S06337S, ICD-10-D-S06377A, ICD-10-D-S06380A, ICD-10-D-S06380D, ICD-10-D-S06380S, ICD-10-D-S06381A, ICD-10-D-S06381D, ICD-10-D-S06382S, ICD-10-D-S06384A, ICD-10-D-S06385S, ICD-10-D-S06387A, ICD-10-D-S06387S, ICD-10-D-S06389A, ICD-10-D-S06389D, ICD-10-D-S06389S, ICD-10-D-Z85841, ICD-10-D-Z86011                                                                                                                                                                                                                                                                                                                                                                                                                                                                                                                                                                                  |
| Non-Alzheimer's Dementia                                            | ICD-9-D-29040, ICD-9-D-29041, ICD-9-D-29042, ICD-9-D-29043, ICD-9-D-33119, ICD-9-D-33182                                                                                                                                                                                                                                                                                                                                 | ICD-10-D-F0150, ICD-10-D-F0151, ICD-10-D-G3109, ICD-10-D-G3183                                                                                                                                                                                                                                                                                                                                                                                                                                                                                                                                                                                                                                                                                                                                                                                                                                                                                                                                                                                                                                                                                                                                                                                            |
| Obesity                                                             | ICD-9-D-2780, ICD-9-D-27800, ICD-9-D-27801, ICD-9-D-27802, ICD-9-D-27803                                                                                                                                                                                                                                                                                                                                                 | ICD-10-D-E660;ICD-10-D-E669                                                                                                                                                                                                                                                                                                                                                                                                                                                                                                                                                                                                                                                                                                                                                                                                                                                                                                                                                                                                                                                                                                                                                                                                                               |
| Pulmonary Heart Disease                                             | ICD-9-D-4150;ICD-9-D-41799                                                                                                                                                                                                                                                                                                                                                                                               | ICD-10-D-I26;ICD-10-D-I279                                                                                                                                                                                                                                                                                                                                                                                                                                                                                                                                                                                                                                                                                                                                                                                                                                                                                                                                                                                                                                                                                                                                                                                                                                |
| Non-Melanoma Skin Cancer                                            | ICD-9-D-17300, ICD-9-D-17309, ICD-9-D-17320, ICD-9-D-17329, ICD-9-D-17330, ICD-9-D-17339, ICD-9-D-17340, ICD-9-D-17349, ICD-9-D-17350, ICD-9-D-17359, ICD-9-D-17360, ICD-9-D-17369, ICD-9-D-17370, ICD-9-D-17379, ICD-9-D-17380, ICD-9-D-17389, ICD-9-D-17390, ICD-9-D-17399, ICD-9-D-1982, ICD-9-D-2160, ICD-9-D-2163, ICD-9-D-2164, ICD-9-D-2165, ICD-9-D-2166, ICD-9-D-2167, ICD-9-D-2168, ICD-9-D-2169, ICD-9-D-2382 | ICD-10-D-C4400, ICD-10-D-C4409, ICD-10-D-C44101, ICD-10-D-C44102, ICD-10-D-C44109, ICD-10-D-C44191, ICD-10-D-C44192, ICD-10-D-C44199, ICD-10-D-C44201, ICD-10-D-C44202, ICD-10-D-C44209, ICD-10-D-C44291, ICD-10-D-C44292, ICD-10-D-C44299, ICD-10-D-C44300, ICD-10-D-C44301, ICD-10-D-C44309, ICD-10-D-C44390, ICD-10-D-C44391, ICD-10-D-C44399, ICD-10-D-C4440, ICD-10-D-C4449, ICD-10-D-C44500, ICD-10-D-C44501, ICD-10-D-C44509, ICD-10-D-C44590, ICD-10-D-C44591, ICD-10-D-C44599, ICD-10-D-C44601, ICD-10-D-C44602, ICD-10-D-C44609, ICD-10-D-C44691, ICD-10-D-C44692, ICD-10-D-C44699, ICD-10-D-C44701, ICD-10-D-C44702, ICD-10-D-C44709, ICD-10-D-C44791, ICD-10-D-C44792, ICD-10-D-C44799, ICD-10-D-C4480, ICD-10-D-C4489, ICD-10-D-C4490, ICD-10-D-C4499, ICD-10-D-C792, ICD-10-D-D170, ICD-10-D-D171, ICD-10-D-D1720, ICD-10-D-D1721, ICD-10-D-D1722, ICD-10-D-D1723, ICD-10-D-D1724, ICD-10-D-D1730, ICD-10-D-D1739, ICD-10-D-D230, ICD-10-D-D2310, ICD-10-D-D2311, ICD-10-D-D2312, ICD-10-D-D2320, ICD-10-D-D2321, ICD-10-D-D2322, ICD-10-D-D2330, ICD-10-D-D2339, ICD-10-D-D234, ICD-10-D-D235, ICD-10-D-D2360, ICD-10-D-D2361, ICD-10-D-D2362, ICD-10-D-D2370, ICD-10-D-D2371, ICD-10-D-D2372, ICD-10-D-D239, ICD-10-D-D485, ICD-10-D-D492 |
| Tobacco Use                                                         | ICD-9-D-3051, ICD-9-D-98984, ICD-9-D-V1582                                                                                                                                                                                                                                                                                                                                                                               | ICD-10-D-F17220, ICD-10-D-F17221, ICD-10-D-F17223, ICD-10-D-F17228, ICD-10-D-F17229, ICD-10-D-F17290, ICD-10-D-F17291, ICD-10-D-F17293, ICD-10-D-F17298, ICD-10-D-F17299, ICD-10-D-Z720                                                                                                                                                                                                                                                                                                                                                                                                                                                                                                                                                                                                                                                                                                                                                                                                                                                                                                                                                                                                                                                                   |
| Deep Vein Thrombosis                                                | ICD-9-D-4532, ICD-9-D-4533, ICD-9-D-4534, ICD-9-D-45382, ICD-9-D-45384, ICD-9-D-45385, ICD-9-D-45386                                                                                                                                                                                                                                                                                                                     | ICD-10-D-I26;ICD-10-D-I2699                                                                                                                                                                                                                                                                                                                                                                                                                                                                                                                                                                                                                                                                                                                                                                                                                                                                                                                                                                                                                                                                                                                                                                                                                               |
